# Supplementary material
Source: Springer Nature journal article supplement (https://www.springermedizin.de/resource/supplementary/12879_2009_1199_MOESM1_ESM.pdf/9442072)
Supplement: MOESM1 [file 9442072]

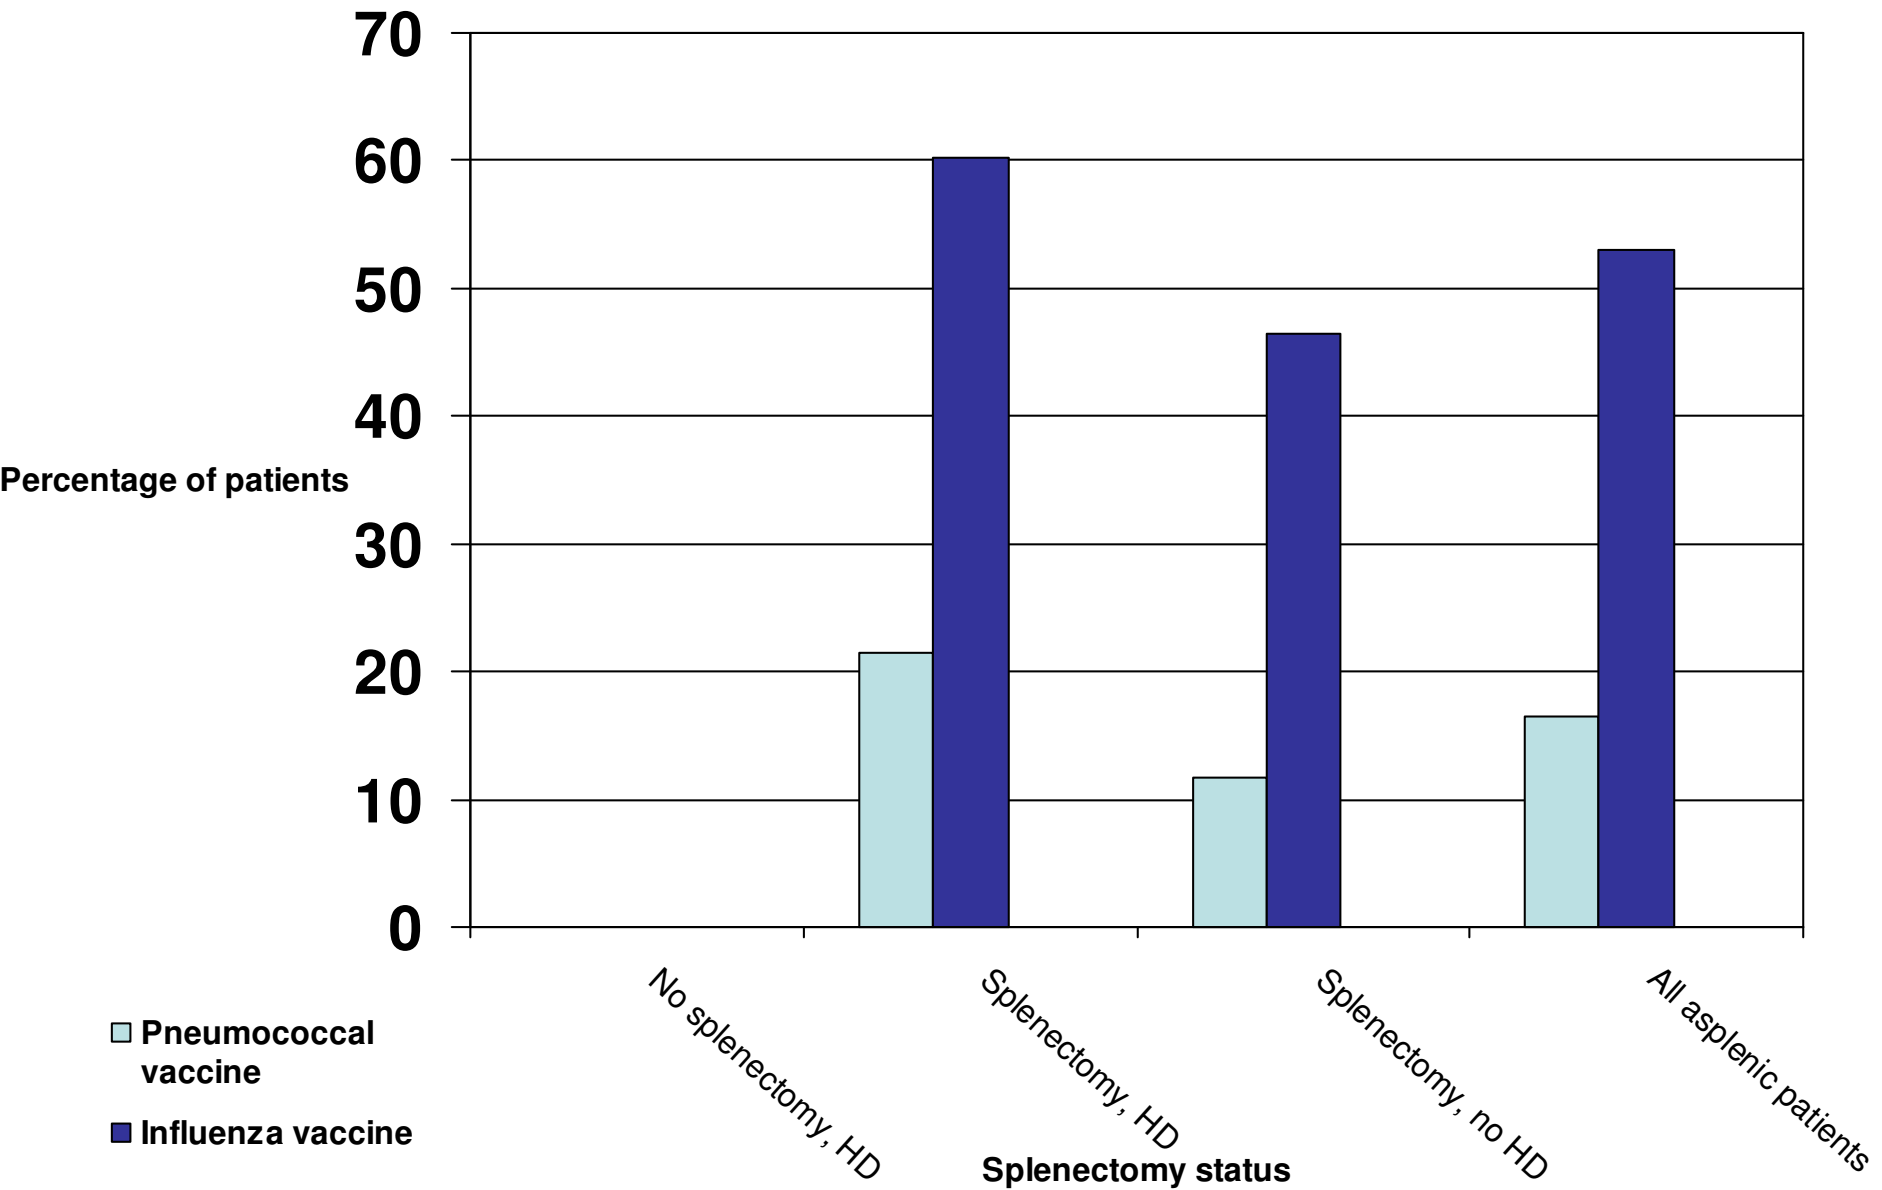

70  
60  
50  
40  
30  
20  
10  
0

Percentage of patients

■ Pneumococcal vaccine  
■ Influenza vaccine

No splenectomy, HD  
Splenectomy, HD  
Splenectomy, no HD  
All asplenic patients  
Splenectomy status
